# Supplementary material for: Discharge Patterns of Potentially Harmful Elements (PHEs) from Coking Plants and Its Relationship with Soil PHE Contents in the Beijing–Tianjin–Hebei Region, China
Source: MDPI journal article supplement (doi:10.3390/toxics10050240), 2022-05-10
Supplement: s1 [file s1]

# Supplementary Materials: Discharge Patterns of Potentially Harmful Elements (PHEs) from Coking Plants and Its Relationship with Soil PHE Contents in the Beijing–Tianjin–Hebei Region, China

Xiaoming Wan, Weibin Zeng, Gaoquan Gu, Lingqing Wang and Mei Lei

**Table S1.** Averaged Concentrations ( $\mu\text{g}\cdot\text{g}^{-1}$ ) and Emission Rates (%) of PHEs from Coals in the BTH [11,13].

| Province       | Hg    | As    | Pb    | Cd    | Cr    | Ni    | Cu    | Zn    |
|----------------|-------|-------|-------|-------|-------|-------|-------|-------|
| Beijing        | 0.17  | 4.02  | 26.74 | 0.66  | 23.39 | 15.27 | 27.82 | 63.24 |
| Tianjin        | 0.17  | 3.98  | 26.52 | 0.69  | 22.39 | 15.14 | 27.84 | 63.76 |
| Hebei          | 0.19  | 5.17  | 27.45 | 0.25  | 20.71 | 10.50 | 22.95 | 49.06 |
| Emission rates | 91.63 | 70.33 | 61.30 | 62.23 | 54.13 | 36.45 | 50.33 | 53.28 |

**Table S2.** Classification of Potential Ecological Risk Index.

| Risk Level              | Ei      | Risk Level              | RI      |
|-------------------------|---------|-------------------------|---------|
| Low Risk (I)            | 0–40    | Low Risk (I)            | 0–150   |
| Moderate Risk (II)      | 40–80   | Moderate Risk (II)      | 150–300 |
| Considerable Risk (III) | 80–160  | Considerable Risk (III) | 300–600 |
| High Risk (IV)          | 160–320 | High Risk (IV)          | >600    |
| Very High Risk (V)      | >320    |                         |         |

**Table S3.** Contribution Rate of Coking Plants to the Total PHEs Emissions in BTH.

| City           | TJ   | TS    | HD    | BD   | CD   |
|----------------|------|-------|-------|------|------|
| Percentage / % | 1.15 | 14.15 | 9.93  | 8.36 | 4.19 |
| City           | SJZ  | QHD   | XT    | ZJK  | BTH  |
| Percentage / % | 2.57 | 0.05  | 16.82 | 7.87 | 7.73 |
